# Supplementary material
Source: publisher site journal article supplement (https://www.dovepress.com/article/490860)
Supplement: Supplementary file 1 [file get_supplementary_file.php]

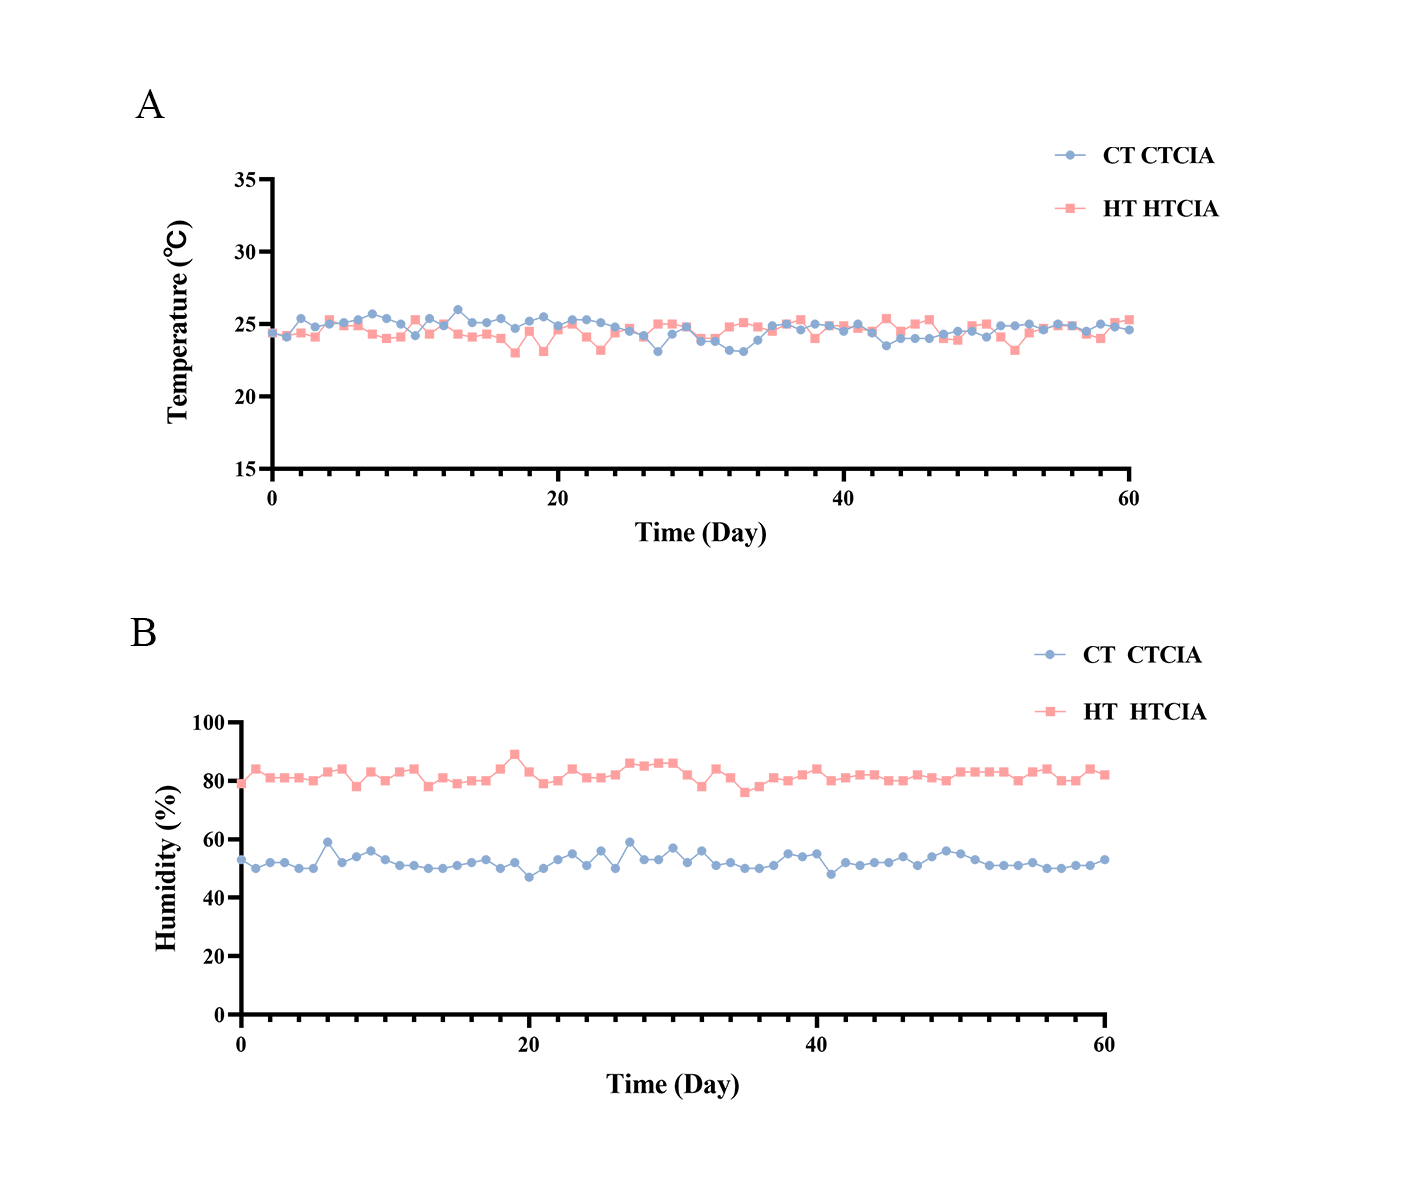


**Supplementary figure 1.** Trend chart of temperature and humidity.


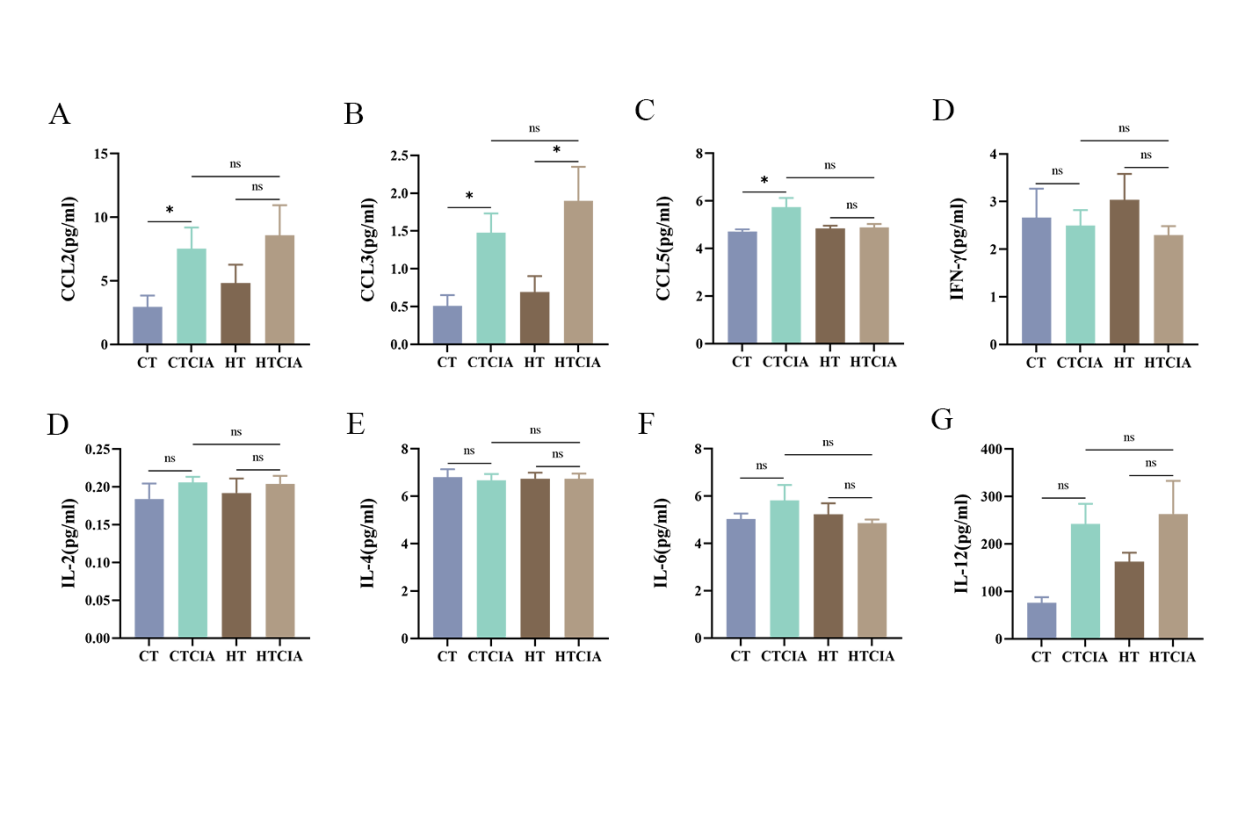


**Supplementary figure 2.** Results of serum inflammatory factors.（A-G）Results of other inflammatory

factors detected through Elisa. Values are expressed as SEM ± mean. "*" = P<0.05, "ns" = P ＞ 0.05. CT, control

group; CTCIA, collagen-induced arthritis group induced at 50% humidity; HT, blank group at 80% humidity;

HTCIA, collagen-induced arthritis group induced at 80% humidity.


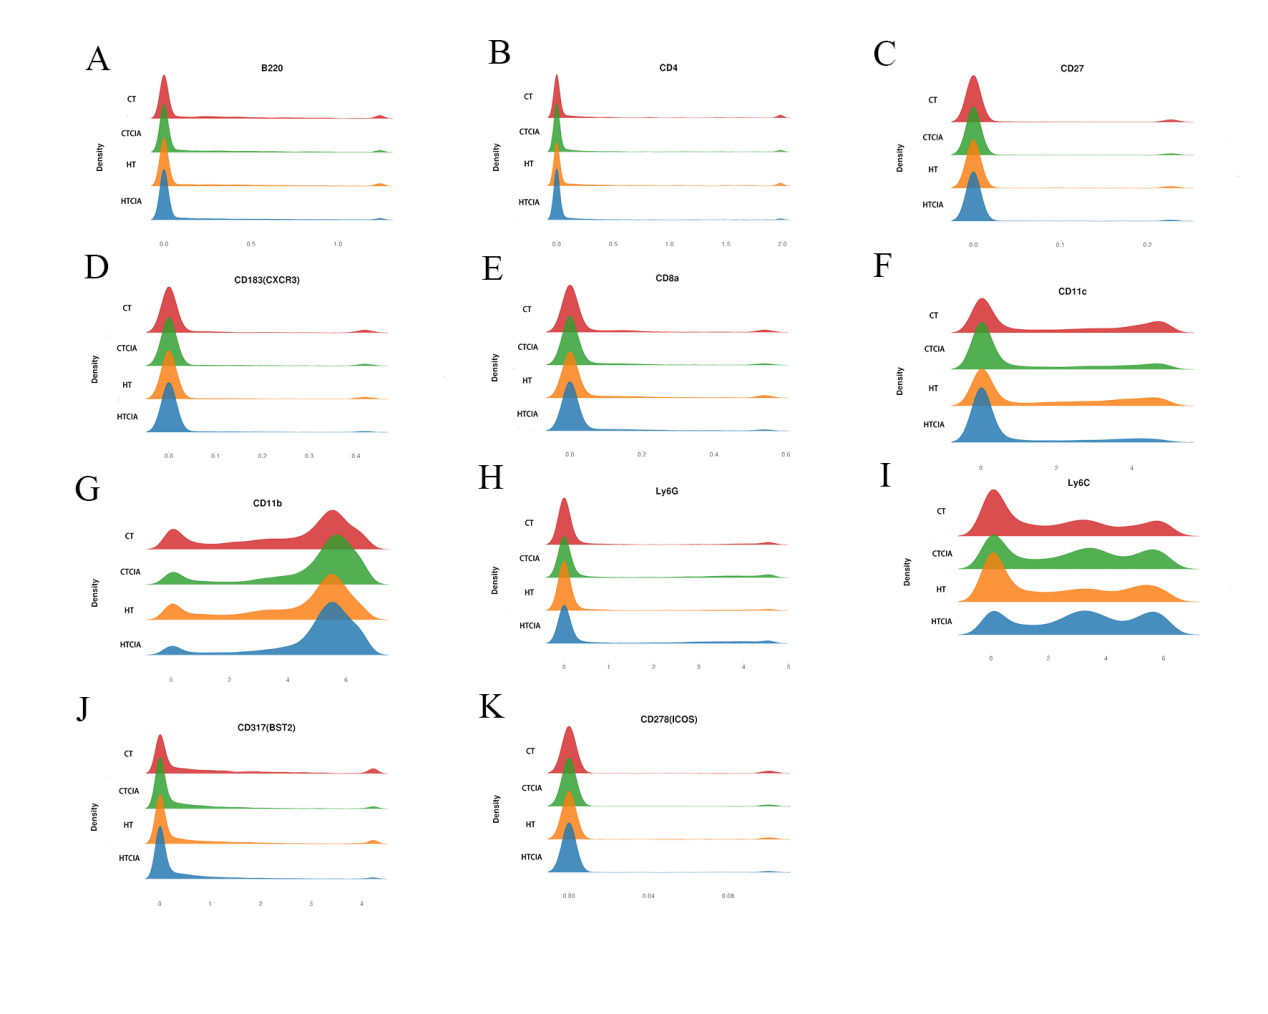


**Supplementary figure 3.** Mass spectrometry flow cytometry results.（A-K）Density plots of mass cytometry

flow maker


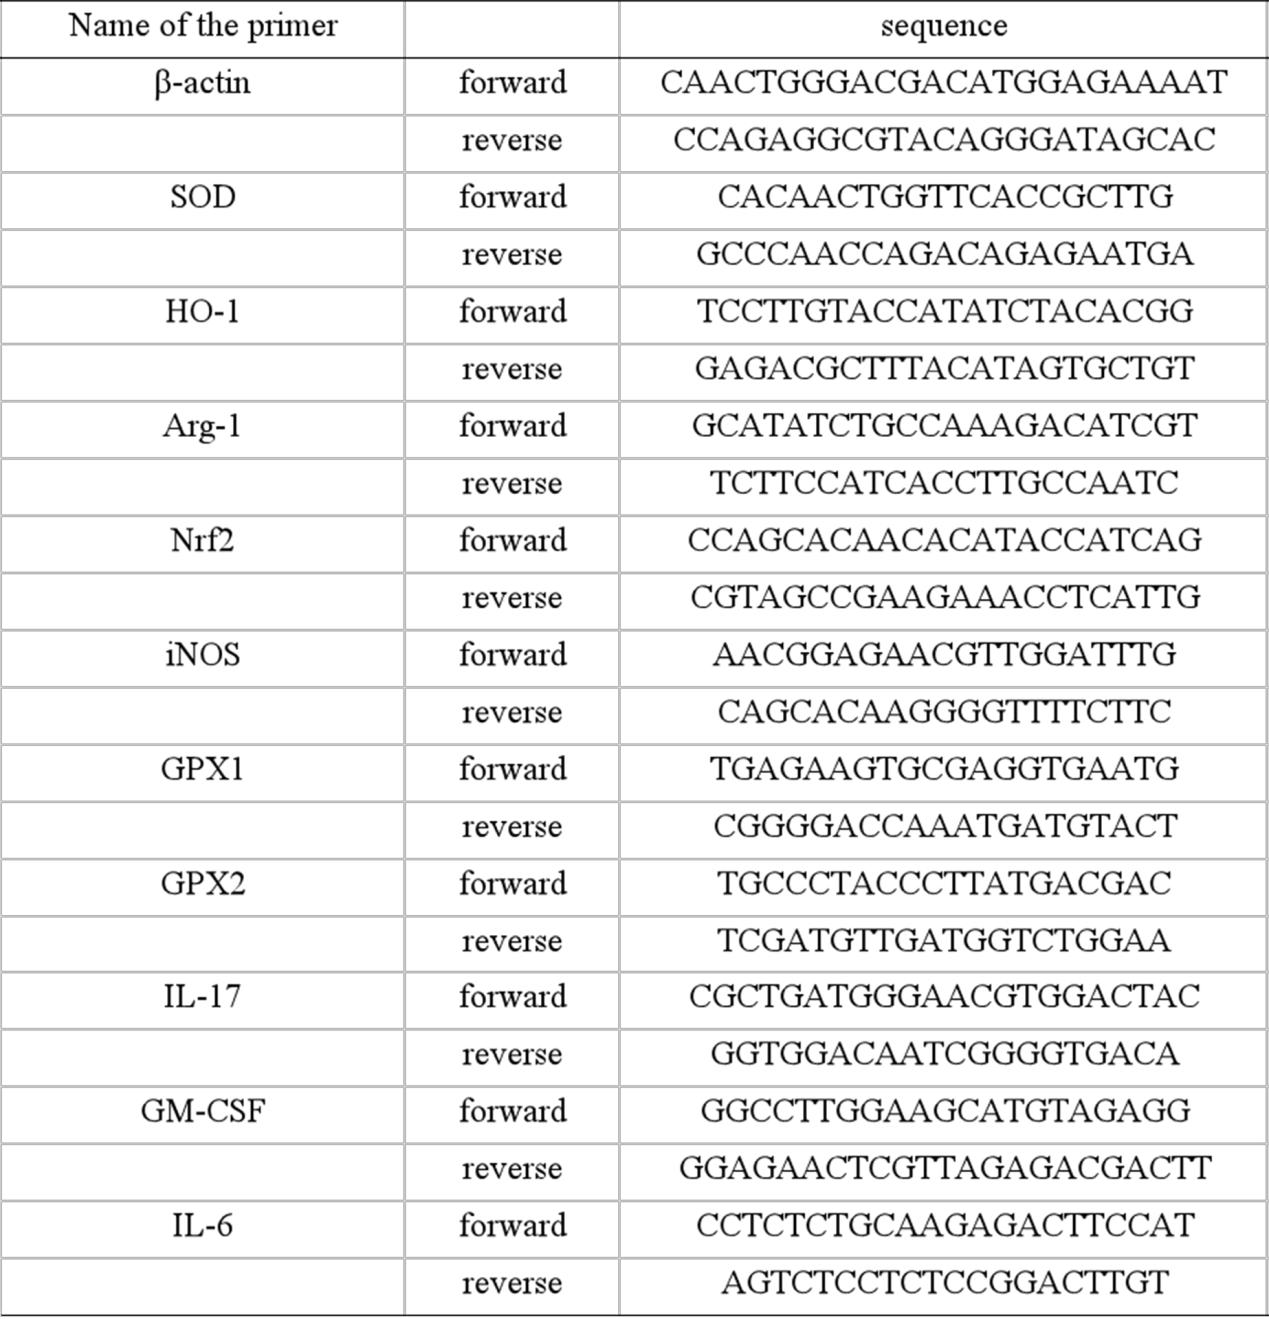


**Supplementary Table 1.** PCR primers.
